# Supplementary material
Source: MDPI journal article supplement (https://www.mdpi.com/2071-1050/12/21/8992)
Supplement: s1 [file s1]

# Systematic Evaluation of Nutrition Indicators for use within Food LCA Studies

## 1. Analyzed food products

Figure 1 shows the 118 individual foods and 53 subgroups color-coded according to the Swedish food based dietary guidelines (“A way to a healthier you” brochure, [1]). Briefly, foods whose consumption should be increased were classified as “green”. They belong to 4 food groups: vegetables and legumes, fruit and berries, fish and seafood, nuts and seeds. Foods which are considered healthier options and are hence to be preferred were classified as yellow. They include vegetable oils, low fat dairy products and wholegrain cereal products. Foods whose consumption should be reduced were classified as red. They either belong to four categories (red and processed meats, beverages and foods with added sugars, foods high in salt, alcohol) or are less healthy alternatives to the “yellow” foods (i.e. animal fats, refined cereal products, medium or high fat dairy products). Processed foods in the green and yellow categories were further analyzed for their coherence with the nutritional criteria for the SFA’s keyhole symbol. Where the product was not fully compliant with the threshold levels for key nutrients (i.e. saturated fat and salt), it was labelled as red. After color-coding of individual foods, food subgroups were also classified as green, yellow or red accordingly.

**Table S1.** List of analyzed food products from the Swedish market, partition in subgroups and groups, and portion sizes. Food items and subgroups were color-coded according to the Swedish dietary guidelines.

| Food groups                            | Food subgroups                               | Food products                                   | Portion size (g) | Rationale for color-coding                                         |
|----------------------------------------|----------------------------------------------|-------------------------------------------------|------------------|--------------------------------------------------------------------|
| Dairy products                         |                                              | Milk, 3% fat, enriched with vitamin D           | 200              | Higher fat alternative, to be replaced by fat-reduced alternatives |
|                                        |                                              | High fat and medium fat milk and yoghurt        | 200              | Higher fat alternative, to be replaced by fat-reduced alternatives |
|                                        |                                              | Yoghurt, natural flavor, 3 % fat                | 200              | Higher fat alternative, to be replaced by fat-reduced alternatives |
|                                        | High fat cream, crème fraiche and sour cream | Whipping cream, 40% fat                         | 25               | Higher fat alternative, to be replaced by fat-reduced alternatives |
|                                        |                                              | Crème fraiche, 34% fat                          | 28               | Higher fat alternative, to be replaced by fat-reduced alternatives |
|                                        |                                              | Sour cream, 12% fat                             | 28               | Higher fat alternative, to be replaced by fat-reduced alternatives |
|                                        | High fat cheese                              | Hard cheese, 28% fat                            | 15               | Higher fat alternative, to be replaced by fat-reduced alternatives |
|                                        | Low fat milk, yoghurt and soured milk        | Low fat milk, 0,5% fat, enriched with vitamin D | 200              | Lower fat alternative, to be preferred                             |
|                                        |                                              | Low fat soured milk, 0,5% fat                   | 200              | Lower fat alternative, to be preferred                             |
|                                        |                                              | Low fat yoghurt, natural flavor, 0,5% fat       | 200              | Lower fat alternative, to be preferred                             |
|                                        | Light cream and crème fraiche                | Light cream, 20% fat                            | 25               | Lower fat alternative but not compliant with keyhole               |
|                                        |                                              | Light crème fraiche, 15% fat                    | 28               | Lower fat alternative but not compliant with keyhole               |
|                                        | Low fat cheese                               | Low fat hard cheese, 17% fat                    | 15               | Lower fat alternative, to be preferred                             |
| Plant-based dairy products substitutes |                                              | Soy drink, enriched, 1,5% fat                   | 200              | Lower-fat alternative, to be preferred                             |
|                                        | Enriched plant-based drinks                  | Almond drink, enriched, 1,3% fat                | 200              | Lower-fat alternative, to be preferred                             |
|                                        |                                              | Oat drink, enriched, 1,1% fat                   | 200              | Lower-fat alternative, to be preferred                             |
|                                        | Plant-based cooking cream                    | Base for cooking, soy, 17% fat                  | 61               | Not compliant with keyhole                                         |
|                                        |                                              | Base for cooking, oat, 13% fat                  | 61               | Not compliant with keyhole                                         |
|                                        |                                              | Coconut milk, 24% fat                           | 61               | Not compliant with keyhole                                         |
| Egg                                    | Egg                                          | Egg, hard boiled                                | 50               | Healthy protein source, to be preferred                            |

|                                                 |                                         |                                         |     |                                               |
|-------------------------------------------------|-----------------------------------------|-----------------------------------------|-----|-----------------------------------------------|
| <b>Poultry</b>                                  | Poultry                                 | Chicken breast with skin, fried         | 125 | Healthy protein source, to be preferred       |
|                                                 | Minced meat (beef and pork)             | Minced meat (67% beef, 33% pork), fried | 100 | Red meat, consumption to be reduced           |
| <b>Meat</b>                                     | Red meat from ruminants (beef and lamb) | Beef entrecôte, fried                   | 100 | Red meat, consumption to be reduced           |
|                                                 |                                         | Lamb meat, fried                        | 100 | Red meat, consumption to be reduced           |
|                                                 | Venison (deer bred in captivity)        | Deer meat, oven baked                   | 100 | Red meat, consumption to be reduced           |
|                                                 | Pork                                    | Pork meat, fried                        | 100 | Red meat, consumption to be reduced           |
|                                                 | Cold cuts                               | Pork ham, smoked, 1-3% fat              | 15  | Red meat, consumption to be reduced           |
|                                                 |                                         | Salami, 34-44% fat                      | 15  | Red meat, consumption to be reduced           |
|                                                 | Liver paste                             | Spreadable liver paste, 24% fat         | 14  | Red meat, consumption to be reduced           |
|                                                 | Sausage                                 | Sausage (e.g. Chorizo), fried, 73% meat | 100 | Red meat, consumption to be reduced           |
|                                                 |                                         | Pork sausage, fried, 24% meat           | 100 | Red meat, consumption to be reduced           |
|                                                 |                                         | Sausage, boiled, 51-54% meat            | 100 | Red meat, consumption to be reduced           |
| <b>Fish and seafood</b>                         | Salmon                                  | Salmon, fried                           | 130 | Fish and seafood, consumption to be increased |
|                                                 | Pelagic fish                            | Herring, canned                         | 35  | Fish and seafood, consumption to be increased |
|                                                 |                                         | Baltic herring fillet, fried            | 35  | Fish and seafood, consumption to be increased |
|                                                 | Cod                                     | Cod fillet, boiled                      | 125 | Fish and seafood, consumption to be increased |
|                                                 | Crustaceans                             | Prawns, boiled                          | 100 | Fish and seafood, consumption to be increased |
| <b>Legumes and plant-based meat substitutes</b> | Legumes                                 | Brown beans, boiled                     | 190 | Legumes, consumption to be increased          |
|                                                 |                                         | Red lentils, boiled with salt           | 190 | Legumes, consumption to be increased          |
|                                                 |                                         | Chickpeas, canned                       | 190 | Legumes, consumption to be increased          |
|                                                 |                                         | Black beans, canned                     | 190 | Legumes, consumption to be increased          |
|                                                 | Plant-based meat substitutes            | Chickpeas burger (e.g. falafel), fried  | 85  | Not compliant with keyhole                    |
|                                                 |                                         | Soy sausage, fried                      | 100 | Not compliant with keyhole                    |
|                                                 |                                         | Vegetarian minced soy protein, frozen   | 95  | Plant-based meat-alternative, to be preferred |
|                                                 |                                         | Tofu                                    | 85  | Plant-based meat-alternative, to be preferred |

|                                      |                              |                                                 |     |                                                           |
|--------------------------------------|------------------------------|-------------------------------------------------|-----|-----------------------------------------------------------|
| Cereal products                      | Low fiber pasta              | Pasta, boiled with salt                         | 175 | Refined grain, to be replaced by whole-grain alternatives |
|                                      | Rice                         | Rice, long-grain, boiled with salt              | 180 | Refined grain, to be replaced by whole-grain alternatives |
|                                      | Wholegrain bread             | Bread (e.g. graham), wholegrain, 13% fiber      | 40  | Whole-grain alternative, to be preferred                  |
|                                      |                              | Crispbread, rye, wholegrain, 15,5% fiber        | 24  | Whole-grain alternative, to be preferred                  |
|                                      | Low fiber bread              | White bread, 3,5% fiber                         | 40  | Refined grain, to be replaced by whole-grain alternatives |
|                                      |                              | White bread, 5% fiber                           | 40  | Refined grain, to be replaced by whole-grain alternatives |
|                                      |                              | Flat bread, with milk, 4% fiber                 | 25  | Refined grain, to be replaced by whole-grain alternatives |
|                                      | Muesli and breakfast cereals | Muesli, whole grain, natural                    | 40  | Whole-grain alternative, to be preferred                  |
|                                      |                              | Muesli, wholegrain, fruit and berries           | 40  | Whole-grain alternative, to be preferred                  |
|                                      |                              | Muesli, wholegrain, nuts and seeds              | 40  | Whole-grain alternative, to be preferred                  |
|                                      |                              | Breakfast cereals (e.g. corn flakes), fortified | 30  | Refined grain, to be replaced by whole-grain alternatives |
|                                      |                              | Breakfast cereals, wholegrain (e.g. Special K)  | 40  | Whole-grain alternative, to be preferred                  |
|                                      | Porridge                     | Oat porridge, wholegrain, boiled                | 200 | Whole-grain alternative, to be preferred                  |
| Fat and condiments                   | Margarine                    | Margarine, 80 % fat, fortified                  | 5   | Not compliant with keyhole                                |
|                                      |                              | Light margarine, 40% fat, fortified             | 5   | Not compliant with keyhole                                |
|                                      | Vegetable oils               | Rapeseed oil                                    | 14  | Vegetable oil, to be preferred                            |
|                                      |                              | Olive oil                                       | 15  | Vegetable oil, to be preferred                            |
|                                      | Butter and other hard fats   | Butter, 80 % fat                                | 5   | Animal fat, to be replaced by vegetable alternative       |
|                                      |                              | Mixed hard fat, 75% fat, fortified              | 5   | Animal fat, to be replaced by vegetable alternative       |
| Sugar-containing products and snacks | Honey, jams                  | Honey                                           | 20  | Sweets and snacks, consumption to be reduced              |
|                                      |                              | Strawberry jam                                  | 20  | Sweets and snacks, consumption to be reduced              |
|                                      | Chocholate, candies          | Dark chocolate, >70 % cocoa                     | 20  | Sweets and snacks, consumption to be reduced              |

|                       |                   |                               |     |                                              |
|-----------------------|-------------------|-------------------------------|-----|----------------------------------------------|
|                       |                   | Milk chocolate                | 25  | Sweets and snacks, consumption to be reduced |
|                       |                   | Jelly candies                 | 25  | Sweets and snacks, consumption to be reduced |
|                       |                   | Foam candies                  | 25  | Sweets and snacks, consumption to be reduced |
|                       | Biscuits, cakes   | Biscuits, unspecified         | 25  | Sweets and snacks, consumption to be reduced |
|                       |                   | Cake (e.g. cream-layer)       | 110 | Sweets and snacks, consumption to be reduced |
|                       | Ice-cream         | Ice-cream, 12% fat            | 75  | Sweets and snacks, consumption to be reduced |
|                       | Wheat buns, rusks | Sweetened wheat buns          | 25  | Sweets and snacks, consumption to be reduced |
|                       |                   | Wheat rusks                   | 10  | Sweets and snacks, consumption to be reduced |
|                       |                   | Chips, salted                 | 30  | Sweets and snacks, consumption to be reduced |
|                       | Snacks            | Popcorn, 22% fat              | 30  | Sweets and snacks, consumption to be reduced |
|                       |                   | Peanuts, roasted, salted      | 30  | Sweets and snacks, consumption to be reduced |
|                       |                   | Cabbage                       | 70  | Vegetables, consumption to be increased      |
|                       |                   | Cabbage, broccoli and spinach | 100 | Vegetables, consumption to be increased      |
|                       |                   | Kale                          | 100 | Vegetables, consumption to be increased      |
|                       |                   | Spinach                       | 30  | Vegetables, consumption to be increased      |
| Vegetables and potato | Salad vegetables  | Iceberg lettuce               | 40  | Vegetables, consumption to be increased      |
|                       |                   | Tomato                        | 50  | Vegetables, consumption to be increased      |
|                       |                   | Cucumber                      | 50  | Vegetables, consumption to be increased      |
|                       | Root vegetables   | Potatoes, boiled with salt    | 175 | Tubers, consumption to be increased          |
|                       |                   | Potatoes, boiled and fried    | 150 | Not compliant with keyhole                   |
|                       |                   | Potatoes, deep fried, 17% fat | 150 | Not compliant with keyhole                   |
|                       |                   | Carrots                       | 70  | Tubers, consumption to be increased          |
|                       |                   | Beetroot, boiled              | 70  | Tubers, consumption to be increased          |
|                       |                   | Swedish turnip, boiled        | 100 | Tubers, consumption to be increased          |

|                   |                              |                                                     |     |                                            |
|-------------------|------------------------------|-----------------------------------------------------|-----|--------------------------------------------|
| Fruit and berries | Banana                       | Banana                                              | 105 | Fruit, consumption to be increased         |
|                   | Pome fruits and stone fruits | Apple                                               | 125 | Fruit, consumption to be increased         |
|                   |                              | Pear                                                | 138 | Fruit, consumption to be increased         |
|                   |                              | Peach                                               | 135 | Fruit, consumption to be increased         |
|                   | Citrus fruit                 | Orange                                              | 125 | Fruit, consumption to be increased         |
|                   |                              | Clementine, mandarin, tangerine, satsuma            | 75  | Fruit, consumption to be increased         |
|                   |                              | Grapefruit                                          | 95  | Fruit, consumption to be increased         |
|                   | Avocado                      | Avocado                                             | 55  | Fruit, consumption to be increased         |
|                   | Berries                      | Strawberry                                          | 125 | Fruit, consumption to be increased         |
|                   |                              | Raspberry                                           | 125 | Fruit, consumption to be increased         |
|                   |                              | Raspberry, frozen                                   | 125 | Fruit, consumption to be increased         |
|                   |                              | Blueberry                                           | 125 | Fruit, consumption to be increased         |
|                   |                              | Blueberry, frozen                                   | 125 | Fruit, consumption to be increased         |
|                   | Dried fruit                  | Raisin                                              | 45  | Fruit, consumption to be increased         |
|                   |                              | Apricot                                             | 45  | Fruit, consumption to be increased         |
| Nuts and seeds    | Nuts                         | Hazelnuts                                           | 30  | Nuts, consumption to be increased          |
|                   |                              | Almonds                                             | 30  | Nuts, consumption to be increased          |
|                   |                              | Cashews                                             | 30  | Nuts, consumption to be increased          |
|                   |                              | Walnuts                                             | 30  | Nuts, consumption to be increased          |
|                   | Seeds                        | Sunflower seeds                                     | 30  | Seeds, consumption to be increased         |
|                   |                              | Pumpkin seeds                                       | 30  | Seeds, consumption to be increased         |
| Drinks            | Soft drinks                  | Carbonated soft drink                               | 330 | Sugary drinks, consumption to be reduced   |
|                   | Juice                        | Orange juice drink                                  | 200 | Processed fruit, consumption to be reduced |
|                   | Alcoholic drinks             | Beer pilsner, % 3,5 vol.                            | 330 | Alcohol, consumption to be reduced         |
|                   |                              | Red wine, % 14 vol.                                 | 150 | Alcohol, consumption to be reduced         |
|                   | Fruit soup                   | Rosehip soup (pasteurized or from powder), enriched | 250 | Processed fruit, consumption to be reduced |
|                   |                              | Fruit cream, unspecified                            | 125 | Processed fruit, consumption to be reduced |

## 2. Dietary reference intake for the nutrient density calculation

The reference values (Table S2) were based on dietary reference intake (DRI) levels of nutrients for desirable nutrients and maximum recommended intake (MRI) levels for non-desirable nutrients according to the Nordic Nutrition Recommendations 2012 [2]. Average values were used for nutrients where gender-specific recommendations exist. In the case reference values differ between women in fertile age and other women, the higher intake levels recommended for fertile women were used. The reference values are expressed for an average person, 31-60 years of age with a sedentary physical activity level of 1.6.

**Table S2.** Nutrients included in the nutritional assessment and reference values.

| Desirable nutrients                      | Dietary reference intake (DRI)   |     |                       |
|------------------------------------------|----------------------------------|-----|-----------------------|
|                                          | Women                            | Men | Average women and men |
| Protein (g/d) <sup>1</sup>               | 78                               | 97  | 87                    |
| Fibre (g/d)                              | 25                               | 35  | 30                    |
| Omega-3 fatty acids (g/d) <sup>2</sup>   | 2.4                              | 3.0 | 2.7                   |
| Vitamin A (µg RE)                        | 700                              | 900 | 800                   |
| Vitamin D (µg)                           | 10                               | 10  | 10                    |
| Vitamin E (mg)                           | 8.0                              | 10  | 9.0                   |
| Thiamin (mg)                             | 1.1                              | 1.4 | 1.25                  |
| Riboflavin (mg)                          | 1.2                              | 1.5 | 1.35                  |
| Vitamin C (mg)                           | 75                               | 75  | 75                    |
| Niacin equivalents (mg)                  | 14                               | 18  | 16                    |
| Vitamin B6 (mg)                          | 1.2                              | 1.5 | 1.35                  |
| Vitamin B12 (µg)                         | 2.0                              | 2.0 | 2.0                   |
| Folate (µg) <sup>3</sup>                 | 400                              | 300 | 350                   |
| Phosphorus (mg)                          | 600                              | 600 | 600                   |
| Iron (mg) <sup>3</sup>                   | 15                               | 9.0 | 12                    |
| Calcium (mg)                             | 800                              | 800 | 800                   |
| Potassium (g)                            | 3.1                              | 3.5 | 3.3                   |
| Magnesium (mg)                           | 280                              | 350 | 315                   |
| Iodine (µg)                              | 150                              | 150 | 150                   |
| Selenium (µg)                            | 50                               | 60  | 55                    |
| Zinc (mg)                                | 7.0                              | 9.0 | 8.0                   |
| Non-desirable nutrients                  | Maximum Recommended Intake (MRI) |     |                       |
| Added sugar (g/d) <sup>4</sup>           | 52                               | 65  | 58                    |
| Saturated fatty acids (g/d) <sup>4</sup> | 24                               | 30  | 27                    |
| Sodium (g/d)                             | 2.4                              | 2.4 | 2.4                   |

Data based on Nordic Nutrition Recommendations 2012 [2]. Total energy intake refers to an average person with a sedentary physical activity level of 1.6 (8800 kJ for women, 11000 kJ for men).<sup>1</sup>Based on 15% of total energy intake (E%), recommended intake is 10-20 E%. <sup>2</sup>Based on a recommended intake

of 1 E%. <sup>3</sup>Based on recommendation for women of fertile age. <sup>4</sup>Based on a maximum recommended intake of 10 E%.

### 3. Ranking of food subgroups based on 45 variants of nutrient density index NRF (Nutrient Rich Food).

**Table S3a.** Food subgroups ranking in the highest quintile (quintile one, Q1) for nutrient density calculated as NRF9.3 and according to different method choices.

| NRF9.3                                         |                               |                                                |
|------------------------------------------------|-------------------------------|------------------------------------------------|
| Per 100kcal                                    | Per 100g                      | Per portion                                    |
| Cabbage, broccoli and spinach                  | Seeds                         | Seeds                                          |
| Salad vegetables                               | Liver paste                   | Legumes                                        |
| Berries                                        | Nuts                          | Plant-based meat substitutes                   |
| Citrus fruit                                   | Vegetable oils                | Juice                                          |
| Liver paste                                    | Dried fruit                   | Berries                                        |
| Juice                                          | Snacks                        | Root vegetables                                |
| Seeds                                          | Cabbage, broccoli and spinach | Venison (deer bred in captivity)               |
| Enriched plant-based drinks (soy, almond, oat) | Plant-based meat substitutes  | Nuts                                           |
| Egg                                            | Low-fat cheese                | Cabbage, broccoli and spinach                  |
| Plant-based meat substitutes                   | Egg                           | Dried fruit                                    |
| Dried fruit                                    | Wholegrain bread              | Enriched plant-based drinks (soy, almond, oat) |

  

| Weighted NRF9.3                                |                               |                                                |
|------------------------------------------------|-------------------------------|------------------------------------------------|
| Per 100kcal                                    | Per 100g                      | Per portion                                    |
| Cabbage, broccoli and spinach                  | Seeds                         | Legumes                                        |
| Berries                                        | Liver paste                   | Seeds                                          |
| Salad vegetables                               | Nuts                          | Plant-based meat substitutes                   |
| Citrus fruit                                   | Dried fruit                   | Berries                                        |
| Liver paste                                    | Snacks                        | Venison (deer bred in captivity)               |
| Juice                                          | Cabbage, broccoli and spinach | Juice                                          |
| Seeds                                          | Vegetable oils                | Root vegetables                                |
| Enriched plant-based drinks (soy, almond, oat) | Plant-based meat substitutes  | Dried fruit                                    |
| Plant-based meat substitutes                   | Wholegrain bread              | Nuts                                           |
| Dried fruit                                    | Low-fat cheese                | Cabbage, broccoli and spinach                  |
| Legumes                                        | Egg                           | Enriched plant-based drinks (soy, almond, oat) |

  

| Capped NRF9.3                 |             |                              |
|-------------------------------|-------------|------------------------------|
| Per 100kcal                   | Per 100g    | Per portion                  |
| Cabbage, broccoli and spinach | Seeds       | Seeds                        |
| Salad vegetables              | Nuts        | Legumes                      |
| Berries                       | Dried fruit | Plant-based meat substitutes |
| Citrus fruit                  | Snacks      | Juice                        |



|                                                |                                  |                                                |
|------------------------------------------------|----------------------------------|------------------------------------------------|
| Juice                                          | Cabbage, broccoli and spinach    | Berries                                        |
| Liver paste                                    | Plant-based meat substitutes     | Root vegetables                                |
| Seeds                                          | Liver paste                      | Venison (deer bred in captivity)               |
| Enriched plant-based drinks (soy, almond, oat) | Egg                              | Nuts                                           |
| Egg                                            | Low-fat cheese                   | Cabbage, broccoli and spinach                  |
| Plant-based meat substitutes                   | Wholegrain bread                 | Dried fruit                                    |
| Dried fruit                                    | Venison (deer bred in captivity) | Enriched plant-based drinks (soy, almond, oat) |

### Weighted and Capped NRF9.3

| Per 100kcal                                    | Per 100g                         | Per portion                                    |
|------------------------------------------------|----------------------------------|------------------------------------------------|
| Cabbage, broccoli and spinach                  | Seeds                            | Legumes                                        |
| Salad vegetables                               | Nuts                             | Seeds                                          |
| Berries                                        | Dried fruit                      | Plant-based meat substitutes                   |
| Citrus fruit                                   | Snacks                           | Berries                                        |
| Juice                                          | Cabbage, broccoli and spinach    | Venison (deer bred in captivity)               |
| Liver paste                                    | Plant-based meat substitutes     | Juice                                          |
| Seeds                                          | Liver paste                      | Root vegetables                                |
| Enriched plant-based drinks (soy, almond, oat) | Wholegrain bread                 | Dried fruit                                    |
| Plant-based meat substitutes                   | Low-fat cheese                   | Nuts                                           |
| Dried fruit                                    | Egg                              | Cabbage, broccoli and spinach                  |
| Legumes                                        | Venison (deer bred in captivity) | Enriched plant-based drinks (soy, almond, oat) |

### Capped and Weighted NRF9.3

| Per 100kcal                                    | Per 100g                         | Per portion                                    |
|------------------------------------------------|----------------------------------|------------------------------------------------|
| Cabbage, broccoli and spinach                  | Seeds                            | Legumes                                        |
| Salad vegetables                               | Nuts                             | Seeds                                          |
| Berries                                        | Dried fruit                      | Plant-based meat substitutes                   |
| Citrus fruit                                   | Snacks                           | Berries                                        |
| Juice                                          | Cabbage, broccoli and spinach    | Venison (deer bred in captivity)               |
| Liver paste                                    | Plant-based meat substitutes     | Juice                                          |
| Seeds                                          | Liver paste                      | Root vegetables                                |
| Enriched plant-based drinks (soy, almond, oat) | Wholegrain bread                 | Dried fruit                                    |
| Plant-based meat substitutes                   | Egg                              | Nuts                                           |
| Dried fruit                                    | Low-fat cheese                   | Cabbage, broccoli and spinach                  |
| Legumes                                        | Venison (deer bred in captivity) | Enriched plant-based drinks (soy, almond, oat) |

Foods are color-coded according to the Swedish dietary guidelines [1]: green indicates foods whose consumption should be increased, yellow indicates foods that represent healthier alternatives and should hence be preferred; red indicates foods whose consumption should be reduced.

**Table S3b.** Food subgroups ranking in the highest quintile (quintile one, Q1) for nutrient density calculated as NRF11.3 and according to different method choices.

| NRF11.3                                        |                               |                                                |
|------------------------------------------------|-------------------------------|------------------------------------------------|
| Per 100kcal                                    | Per 100g                      | Per portion                                    |
| Cabbage, broccoli and spinach                  | Seeds                         | Salmon                                         |
| Salad vegetables                               | Liver paste                   | Legumes                                        |
| Berries                                        | Nuts                          | Seeds                                          |
| Citrus fruit                                   | Vegetable oils                | Plant-based meat substitutes                   |
| Juice                                          | Snacks                        | Juice                                          |
| Liver paste                                    | Cabbage, broccoli and spinach | Berries                                        |
| Enriched plant-based drinks (soy, almond, oat) | Dried fruit                   | Enriched plant-based drinks (soy, almond, oat) |
| Egg                                            | Margarine                     | Cabbage, broccoli and spinach                  |
| Seeds                                          | Plant-based meat substitutes  | Root vegetables                                |
| Plant-based meat substitutes                   | Egg                           | Venison (deer bred in captivity)               |
| Low fat milk, yoghurt and soured milk          | Salmon                        | Poultry                                        |

  

| Weighted NRF11.3                               |                               |                                                |
|------------------------------------------------|-------------------------------|------------------------------------------------|
| Per 100kcal                                    | Per 100g                      | Per portion                                    |
| Cabbage, broccoli and spinach                  | Seeds                         | Salmon                                         |
| Salad vegetables                               | Liver paste                   | Legumes                                        |
| Berries                                        | Nuts                          | Seeds                                          |
| Citrus fruit                                   | Dried fruit                   | Plant-based meat substitutes                   |
| Liver paste                                    | Salmon                        | Berries                                        |
| Juice                                          | Cabbage, broccoli and spinach | Juice                                          |
| Enriched plant-based drinks (soy, almond, oat) | Snacks                        | Cabbage, broccoli and spinach                  |
| Egg                                            | Margarine                     | Root vegetables                                |
| Plant-based meat substitutes                   | Plant-based meat substitutes  | Poultry                                        |
| Pelagic fish                                   | Egg                           | Enriched plant-based drinks (soy, almond, oat) |
| Seeds                                          | Wholegrain bread              | Venison (deer bred in captivity)               |

  

| Capped NRF11.3                                 |                               |                                                |
|------------------------------------------------|-------------------------------|------------------------------------------------|
| Per 100kcal                                    | Per 100g                      | Per portion                                    |
| Cabbage, broccoli and spinach                  | Seeds                         | Legumes                                        |
| Salad vegetables                               | Margarine                     | Seeds                                          |
| Berries                                        | Nuts                          | Salmon                                         |
| Citrus fruit                                   | Snacks                        | Plant-based meat substitutes                   |
| Juice                                          | Cabbage, broccoli and spinach | Juice                                          |
| Enriched plant-based drinks (soy, almond, oat) | Dried fruit                   | Berries                                        |
| Liver paste                                    | Butter and other hard fats    | Enriched plant-based drinks (soy, almond, oat) |

|                                       |                              |                                  |
|---------------------------------------|------------------------------|----------------------------------|
| Egg                                   | Plant-based meat substitutes | Cabbage, broccoli and spinach    |
| Seeds                                 | Egg                          | Root vegetables                  |
| Plant-based meat substitutes          | Salmon                       | Venison (deer bred in captivity) |
| Low fat milk, yoghurt and soured milk | Liver paste                  | Poultry                          |

#### Weighted and Capped NRF11.3

| Per 100kcal                                    | Per 100g                      | Per portion                                    |
|------------------------------------------------|-------------------------------|------------------------------------------------|
| Cabbage, broccoli and spinach                  | Seeds                         | Legumes                                        |
| Salad vegetables                               | Nuts                          | Seeds                                          |
| Berries                                        | Dried fruit                   | Salmon                                         |
| Citrus fruit                                   | Cabbage, broccoli and spinach | Plant-based meat substitutes                   |
| Juice                                          | Snacks                        | Berries                                        |
| Enriched plant-based drinks (soy, almond, oat) | Plant-based meat substitutes  | Juice                                          |
| Liver paste                                    | Egg                           | Cabbage, broccoli and spinach                  |
| Egg                                            | Salmon                        | Root vegetables                                |
| Plant-based meat substitutes                   | Liver paste                   | Poultry                                        |
| Pelagic fish                                   | Wholegrain bread              | Enriched plant-based drinks (soy, almond, oat) |
| Seeds                                          | Margarine                     | Venison (deer bred in captivity)               |

#### Capped and Weighted NRF11.3

| Per 100kcal                                    | Per 100g                      | Per portion                                    |
|------------------------------------------------|-------------------------------|------------------------------------------------|
| Cabbage, broccoli and spinach                  | Seeds                         | Legumes                                        |
| Salad vegetables                               | Nuts                          | Salmon                                         |
| Berries                                        | Dried fruit                   | Seeds                                          |
| Citrus fruit                                   | Salmon                        | Plant-based meat substitutes                   |
| Enriched plant-based drinks (soy, almond, oat) | Cabbage, broccoli and spinach | Berries                                        |
| Juice                                          | Snacks                        | Juice                                          |
| Liver paste                                    | Plant-based meat substitutes  | Cabbage, broccoli and spinach                  |
| Egg                                            | Egg                           | Root vegetables                                |
| Plant-based meat substitutes                   | Margarine                     | Poultry                                        |
| Pelagic fish                                   | Wholegrain bread              | Enriched plant-based drinks (soy, almond, oat) |
| Seeds                                          | Liver paste                   | Venison (deer bred in captivity)               |

Foods are color-coded according to the Swedish dietary guidelines [1]: green indicates foods whose consumption should be increased, yellow indicates foods that represent healthier alternatives and should hence be preferred; red indicates foods whose consumption should be reduced.

**Table S3c.** Food subgroups ranking in the highest quintile (quintile one, Q1) for nutrient density calculated as NRF21.3 and according to different method choices.

#### NRF21.3

| Per 100kcal                   | Per 100g | Per portion |
|-------------------------------|----------|-------------|
| Cabbage, broccoli and spinach | Seeds    | Salmon      |

|                                                |                                  |                                          |
|------------------------------------------------|----------------------------------|------------------------------------------|
| Cod                                            | Liver paste                      | Cod                                      |
| Salad vegetables                               | Pelagic fish                     | Venison (deer bred in captivity)         |
| Pelagic fish                                   | Salmon                           | Poultry                                  |
| Venison (deer bred in captivity)               | Nuts                             | Legumes                                  |
| Liver paste                                    | Venison (deer bred in captivity) | Pork                                     |
| Berries                                        | Cod                              | Red meat from ruminants                  |
| Egg                                            | Low-fat cheese                   | Minced meat                              |
| Crustaceans                                    | Egg                              | Seeds                                    |
| Enriched plant-based drinks (soy, almond, oat) | High-fat cheese                  | Crustaceans                              |
| Salmon                                         | Poultry                          | High fat and medium-fat milk and yoghurt |

#### Weighted NRF21.3

| Per 100kcal                                    | Per 100g                         | Per portion                      |
|------------------------------------------------|----------------------------------|----------------------------------|
| Cabbage, broccoli and spinach                  | Seeds                            | Salmon                           |
| Cod                                            | Liver paste                      | Cod                              |
| Salad vegetables                               | Salmon                           | Legumes                          |
| Pelagic fish                                   | Nuts                             | Venison (deer bred in captivity) |
| Berries                                        | Pelagic fish                     | Poultry                          |
| Liver paste                                    | Cod                              | Pork                             |
| Venison (deer bred in captivity)               | Venison (deer bred in captivity) | Seeds                            |
| Egg                                            | Egg                              | Minced meat                      |
| Enriched plant-based drinks (soy, almond, oat) | Low-fat cheese                   | Red meat from ruminants          |
| Salmon                                         | Vegetable oils                   | Plant-based meat substitutes     |
| Citrus fruit                                   | Pork                             | Crustaceans                      |

#### Capped NRF21.3

| Per 100kcal                                    | Per 100g                         | Per portion                              |
|------------------------------------------------|----------------------------------|------------------------------------------|
| Cabbage, broccoli and spinach                  | Seeds                            | Salmon                                   |
| Salad vegetables                               | Salmon                           | Cod                                      |
| Cod                                            | Nuts                             | Venison (deer bred in captivity)         |
| Venison (deer bred in captivity)               | Venison (deer bred in captivity) | Poultry                                  |
| Pelagic fish                                   | Low-fat cheese                   | Legumes                                  |
| Liver paste                                    | Liver paste                      | Pork                                     |
| Egg                                            | Pelagic fish                     | Red meat from ruminants                  |
| Crustaceans                                    | Cod                              | Minced meat                              |
| Enriched plant-based drinks (soy, almond, oat) | Egg                              | Seeds                                    |
| Salmon                                         | High-fat cheese                  | Crustaceans                              |
| Low fat milk, yoghurt and soured milk          | Pork                             | High fat and medium-fat milk and yoghurt |

#### Weighted and Capped NRF21.3

| Per 100kcal | Per 100g | Per portion |
|-------------|----------|-------------|
|-------------|----------|-------------|

|                                                |                                  |                                  |
|------------------------------------------------|----------------------------------|----------------------------------|
| Cabbage, broccoli and spinach                  | Seeds                            | Salmon                           |
| Salad vegetables                               | Salmon                           | Cod                              |
| Cod                                            | Nuts                             | Legumes                          |
| Pelagic fish                                   | Liver paste                      | Venison (deer bred in captivity) |
| Berries                                        | Pelagic fish                     | Poultry                          |
| Venison (deer bred in captivity)               | Venison (deer bred in captivity) | Pork                             |
| Egg                                            | Cod                              | Seeds                            |
| Enriched plant-based drinks (soy, almond, oat) | Egg                              | Minced meat                      |
| Salmon                                         | Low-fat cheese                   | Red meat from ruminants          |
| Liver paste                                    | Pork                             | Plant-based meat substitutes     |
| Low fat milk, yoghurt and soured milk          | Poultry                          | Crustaceans                      |

### Capped and Weighted NRF21.3

| Per 100kcal                                    | Per 100g                         | Per portion                      |
|------------------------------------------------|----------------------------------|----------------------------------|
| Cabbage, broccoli and spinach                  | Seeds                            | Salmon                           |
| Salad vegetables                               | Salmon                           | Cod                              |
| Cod                                            | Nuts                             | Legumes                          |
| Pelagic fish                                   | Liver paste                      | Venison (deer bred in captivity) |
| Berries                                        | Venison (deer bred in captivity) | Poultry                          |
| Venison (deer bred in captivity)               | Pelagic fish                     | Pork                             |
| Egg                                            | Cod                              | Seeds                            |
| Enriched plant-based drinks (soy, almond, oat) | Egg                              | Minced meat                      |
| Salmon                                         | Low-fat cheese                   | Red meat from ruminants          |
| Liver paste                                    | Pork                             | Plant-based meat substitutes     |
| Low fat milk, yoghurt and soured milk          | Dried fruit                      | Crustaceans                      |

Foods are color-coded according to the Swedish dietary guidelines [1]: green indicates foods whose consumption should be increased, yellow indicates foods that represent healthier alternatives and should hence be preferred; red indicates foods whose consumption should be reduced.

#### 4. Ranking of food products based on nutrient density, according to different NRF indexes, in the meat, dairy and cereal products groups.

**Table S4a.** Ranking of foods in the meat category over and under the median for nutrient density.

| NRF9.3                 |                        |                        |
|------------------------|------------------------|------------------------|
| Per 100kcal            | Per 100g               | Per portion            |
| Liver paste            | Liver paste            | Game                   |
| Egg                    | Egg                    | Chicken breast         |
| Game                   | Game                   | Liver paste            |
| Beef entrecôte         | Beef entrecôte         | Egg                    |
| Chicken breast         | Chicken breast         | Beef entrecôte         |
| Lamb                   | Lamb                   | Lamb                   |
| Pork                   | Pork                   | Pork                   |
| Minced meat            | Minced meat            | Minced meat            |
| Sausage, boiled        | Pork ham               | Pork ham               |
| Sausage (e.g. Chorizo) | Sausage, boiled        | Salami                 |
| Pork sausage           | Sausage (e.g. Chorizo) | Sausage, boiled        |
| Salami                 | Pork sausage           | Sausage (e.g. Chorizo) |
| Pork ham               | Salami                 | Pork sausage           |
| NRF11.3                |                        |                        |
| Per 100kcal            | Per 100g               | Per portion            |
| Liver paste            | Liver paste            | Game                   |
| Egg                    | Egg                    | Chicken breast         |
| Game                   | Game                   | Liver paste            |
| Beef entrecôte         | Beef entrecôte         | Egg                    |
| Chicken breast         | Chicken breast         | Beef entrecôte         |
| Lamb                   | Lamb                   | Lamb                   |
| Pork                   | Pork                   | Pork                   |
| Minced meat            | Minced meat            | Minced meat            |
| Sausage, boiled        | Pork ham               | Pork ham               |
| Sausage (e.g. Chorizo) | Sausage, boiled        | Salami                 |
| Pork sausage           | Sausage (e.g. Chorizo) | Sausage, boiled        |
| Salami                 | Pork sausage           | Sausage (e.g. Chorizo) |
| Pork ham               | Salami                 | Pork sausage           |
| NRF21.3                |                        |                        |
| Per 100kcal            | Per 100g               | Per portion            |
| Game                   | Liver paste            | Game                   |
| Liver paste            | Game                   | Chicken breast         |
| Egg                    | Egg                    | Lamb                   |
| Pork ham               | Lamb                   | Pork                   |
| Pork                   | Chicken breast         | Minced meat            |
| Chicken breast         | Pork                   | Beef entrecôte         |
| Lamb                   | Minced meat            | Egg                    |

|                        |                        |                        |
|------------------------|------------------------|------------------------|
| Beef entrecôte         | Beef entrecôte         | Sausage (e.g. Chorizo) |
| Minced meat            | Pork ham               | Liver paste            |
| Sausage (e.g. Chorizo) | Sausage (e.g. Chorizo) | Pork sausage           |
| Pork sausage           | Salami                 | Sausage, boiled        |
| Salami                 | Pork sausage           | Pork ham               |
| Sausage, boiled        | Sausage, boiled        | Salami                 |

Foods are color-coded according to the Swedish dietary guidelines [1]: yellow indicates foods that represent healthier alternatives and should hence be preferred; red indicates foods whose consumption should be reduced.

**Table S4b.** Ranking of foods in the dairy category over and under the median for nutrient density.

| NRF9.3              |                     |                     |
|---------------------|---------------------|---------------------|
| Per 100kcal         | Per 100g            | Per portion         |
| Low fat milk        | Low fat hard cheese | Low fat yoghurt     |
| Low fat yoghurt     | Hard cheese         | Low fat milk        |
| Low fat sour milk   | Low fat yoghurt     | Low fat sour milk   |
| Milk, 1,5% fat      | Low fat milk        | Milk, 1,5% fat      |
| Low fat hard cheese | Low fat sour milk   | Milk                |
| Yoghurt             | Milk, 1,5% fat      | Yoghurt             |
| Milk                | Milk                | Low fat hard cheese |
| Hard cheese         | Yoghurt             | Hard cheese         |
| Sour cream          | Sour cream          | Sour cream          |
| Light crème fraiche | Light crème fraiche | Light crème fraiche |
| Whipping cream      | Crème fraiche       | Whipping cream      |
| Crème fraiche       | Whipping cream      | Crème fraiche       |
| Light cream         | Light cream         | Light cream         |

| NRF11.3             |                     |                     |
|---------------------|---------------------|---------------------|
| Per 100kcal         | Per 100g            | Per portion         |
| Low fat milk        | Low fat hard cheese | Low fat yoghurt     |
| Low fat yoghurt     | Hard cheese         | Low fat milk        |
| Low fat sour milk   | Low fat yoghurt     | Low fat sour milk   |
| Milk, 1,5% fat      | Low fat milk        | Milk, 1,5% fat      |
| Low fat hard cheese | Low fat sour milk   | Milk                |
| Yoghurt             | Milk, 1,5% fat      | Yoghurt             |
| Milk                | Milk                | Low fat hard cheese |
| Hard cheese         | Yoghurt             | Hard cheese         |
| Sour cream          | Sour cream          | Sour cream          |
| Light crème fraiche | Light crème fraiche | Light crème fraiche |
| Whipping cream      | Crème fraiche       | Whipping cream      |
| Crème fraiche       | Whipping cream      | Crème fraiche       |
| Light cream         | Light cream         | Light cream         |

| NRF21.3      |                     |              |
|--------------|---------------------|--------------|
| Per 100kcal  | Per 100g            | Per portion  |
| Low fat milk | Low fat hard cheese | Low fat milk |

|                     |                     |                     |
|---------------------|---------------------|---------------------|
| Milk, 1,5% fat      | Hard cheese         | Milk, 1,5% fat      |
| Low fat yoghurt     | Low fat milk        | Milk                |
| Low fat sour milk   | Milk, 1,5% fat      | Low fat yoghurt     |
| Milk                | Milk                | Yoghurt             |
| Yoghurt             | Low fat yoghurt     | Low fat sour milk   |
| Low fat hard cheese | Yoghurt             | Low fat hard cheese |
| Hard cheese         | Low fat sour milk   | Hard cheese         |
| Sour cream          | Sour cream          | Sour cream          |
| Light crème fraiche | Light crème fraiche | Light crème fraiche |
| Light cream         | Light cream         | Light cream         |
| Whipping cream      | Whipping cream      | Whipping cream      |
| Crème fraiche       | Crème fraiche       | Crème fraiche       |

Foods are color-coded according to the Swedish dietary guidelines [1]: yellow indicates foods that represent healthier alternatives and should hence be preferred; red indicates foods whose consumption should be reduced.

**Table 4. c.** Ranking of foods in the cereal products category over and under the median for nutrient density.

| NRF9.3                                |                                       |                                       |
|---------------------------------------|---------------------------------------|---------------------------------------|
| Per 100kcal                           | Per 100g                              | Per portion                           |
| Muesli, wholegrain, nuts and seeds    | Muesli, wholegrain, nuts and seeds    | Muesli, wholegrain, nuts and seeds    |
| Crispbread, rye                       | Crispbread, rye                       | Muesli, whole grain, natural          |
| Bread (e.g. graham), wholegrain       | Muesli, whole grain, natural          | Muesli, wholegrain, fruit and berries |
| Muesli, whole grain, natural          | Muesli, wholegrain, fruit and berries | Crispbread, rye                       |
| Muesli, wholegrain, fruit and berries | Bread (e.g. graham), wholegrain       | Bread (e.g. graham), wholegrain       |
| White bread, 3,5% fiber               | White bread, 3,5% fiber               | Pasta                                 |
| Flat bread, with milk                 | Breakfast cereals, wholegrain         | White bread, 3,5% fiber               |
| White bread, 5% fiber                 | Corn flakes                           | Breakfast cereals, wholegrain         |
| Pasta                                 | Flat bread, with milk                 | Oat porridge                          |
| Oat porridge                          | White bread, 5% fiber                 | Corn flakes                           |
| Breakfast cereals, wholegrain         | Pasta                                 | White bread, 5% fiber                 |
| Corn flakes                           | Oat porridge                          | Flat bread, with milk                 |
| Rice                                  | Rice                                  | Rice                                  |

| NRF11.3                               |                                       |                                       |
|---------------------------------------|---------------------------------------|---------------------------------------|
| Per 100kcal                           | Per 100g                              | Per portion                           |
| Muesli, wholegrain, nuts and seeds    | Muesli, wholegrain, nuts and seeds    | Muesli, wholegrain, nuts and seeds    |
| Crispbread, rye                       | Crispbread, rye                       | Muesli, whole grain, natural          |
| Bread (e.g. graham), wholegrain       | Muesli, whole grain, natural          | Muesli, wholegrain, fruit and berries |
| Muesli, whole grain, natural          | Muesli, wholegrain, fruit and berries | Crispbread, rye                       |
| Muesli, wholegrain, fruit and berries | Bread (e.g. graham), wholegrain       | Bread (e.g. graham), wholegrain       |
| White bread, 3,5% fiber               | White bread, 3,5% fiber               | Pasta                                 |
| Flat bread, with milk                 | Breakfast cereals, wholegrain         | White bread, 3,5% fiber               |
| White bread, 5% fiber                 | Corn flakes                           | Breakfast cereals, wholegrain         |
| Pasta                                 | Flat bread, with milk                 | Oat porridge                          |



|                               |                       |                       |
|-------------------------------|-----------------------|-----------------------|
| Oat porridge                  | White bread, 5% fiber | Corn flakes           |
| Breakfast cereals, wholegrain | Pasta                 | White bread, 5% fiber |
| Corn flakes                   | Oat porridge          | Flat bread, with milk |
| Rice                          | Rice                  | Rice                  |

### NRF21.3

| Per 100kcal                           | Per 100g                              | Per portion                           |
|---------------------------------------|---------------------------------------|---------------------------------------|
| Corn flakes                           | Corn flakes                           | Muesli, wholegrain, nuts and seeds    |
| Muesli, wholegrain, nuts and seeds    | Muesli, wholegrain, nuts and seeds    | Corn flakes                           |
| Oat porridge                          | Crispbread, rye                       | Oat porridge                          |
| Crispbread, rye                       | Muesli, whole grain, natural          | Pasta                                 |
| Bread (e.g. graham), wholegrain       | Muesli, wholegrain, fruit and berries | Muesli, whole grain, natural          |
| Muesli, whole grain, natural          | Bread (e.g. graham), wholegrain       | Muesli, wholegrain, fruit and berries |
| Flat bread, with milk                 | Flat bread, with milk                 | Bread (e.g. graham), wholegrain       |
| White bread, 3,5% fiber               | White bread, 3,5% fiber               | Crispbread, rye                       |
| Muesli, wholegrain, fruit and berries | Breakfast cereals, wholegrain         | Rice                                  |
| White bread, 5% fiber                 | White bread, 5% fiber                 | White bread, 3,5% fiber               |
| Pasta                                 | Pasta                                 | Breakfast cereals, wholegrain         |
| Rice                                  | Oat porridge                          | White bread, 5% fiber                 |
| Breakfast cereals, wholegrain         | Rice                                  | Flat bread, with milk                 |

Foods are color-coded according to the Swedish dietary guidelines [1]: yellow indicates foods that represent healthier alternatives and should hence be preferred; red indicates foods whose consumption should be reduced.

### Supplementary references

1. Swedish Food Agency. Hitta ditt sätt att äta grönnare, lagom mycket och röra på dig (Find your way - To eat greener, adequate and to do physical activity) [in Swedish], 2017. [https://www.livsmedelsverket.se/globalassets/publikationsdatabas/broschyrrer/kostraed\\_webb.pdf](https://www.livsmedelsverket.se/globalassets/publikationsdatabas/broschyrrer/kostraed_webb.pdf) (accessed on )
2. Nordic Council of Ministers. Nordic Nutrition Recommendations 2012, 2014. <https://www.norden.org/en/publication/nordic-nutrition-recommendations-2012> (accessed on )
